# Supplementary material
Source: publisher site journal article supplement (https://static.cambridge.org/content/id/urn:cambridge.org:id:article:S0265051722000237/resource/name/S0265051722000237supp001.docx)
Supplement: Supplementary file 1 [file S0265051722000237supp001.docx]

# Appendix 1: Blank Copy of Questionnaire.

# Investigating the impact of Melody on the professional development and career pathways of Birmingham Conservatoire student volunteers

# Between what dates did you volunteer with MMB?

# Please rate your experience in each area prior to volunteering with MMB.

|  | Never | Very rare | Rare | Occasional | Frequent | Very Frequent |
| --- | --- | --- | --- | --- | --- | --- |
| Experience *volunteering with a charity* previous to Melody |  |  |  |  |  |  |
| Experience *devising and creating musical activities* previous to Melody |  |  |  |  |  |  |
| Experience *delivering music workshop*s previous to Melody |  |  |  |  |  |  |
| Experience working with *individuals with learning disabilities* previous to Melody |  |  |  |  |  |  |
| Experience working with *individuals with learning disabilities in music* previous to Melody |  |  |  |  |  |  |

# Please tell us, in your own words, about your experience of volunteering at MMB:

# What have you been doing since you left the Conservatoire; e.g. further study, volunteering positions, professional work? (Please tick all that apply)

|  | Activity *does not include* individuals with learning disabilities | Activity *includes* individuals with learning disabilities |
| --- | --- | --- |
| Further Study (performance) |  |  |
| Further Study (teaching) |  |  |
| Classroom teaching |  |  |
| Instrumental teaching |  |  |
| Music project leading |  |  |
| Volunteering |  |  |
| Apprentice |  |  |
| Arts Administration |  |  |
| Other (please specify).................................................. |  |  |

# Additional comments: _______________________________________________________________ _______________________________________________________________________________________________________________________________________________________________________________________________________________________________________________________________

# Do you feel that volunteering with MMB was useful to you in securing the position(s) discussed above?

# YES/NO

# If YES please state how/why?

# Do you feel that volunteering with MMB has impacted on your career choices?

# YES/NO

# If YES please state how/why?

# 7. What was the impact of volunteering with MMB?

|  | Strongly Disagree | Disagree | Undecided | Agree | Strongly Agree |
| --- | --- | --- | --- | --- | --- |
| Participating changed my view of people with learning disabilities |  |  |  |  |  |
| Participating did not develop my workshop leading skills |  |  |  |  |  |
| Participating developed my skills to work with people with learning disabilities |  |  |  |  |  |
| My teaching skills were not developed whilst participating |  |  |  |  |  |
| Particiapting did not impact on my perception of people with learning disabilities |  |  |  |  |  |
| My leadership skills were developed at MMB |  |  |  |  |  |
| Participating impacted on my creative approach to teaching |  |  |  |  |  |

# Did volunteering at MMB affect your engagement with individuals with learning disabilities? If so, how?

# What would you say to students considering exploring music making with individuals with learning disabilities?

# Is there anything else you would like to share about the experience of volunteering at MMB?
